# Supplementary material for: Oxidation of anisole over MCM-48 materials modified by incorporation of transition and inner transition metals
Source: Royal Society of Chemistry journal article supplement (doi:10.1039/c2cy20198d), 2012-01-01
Supplement: c2cy20198d.pdf [file c2cy20198d.pdf]

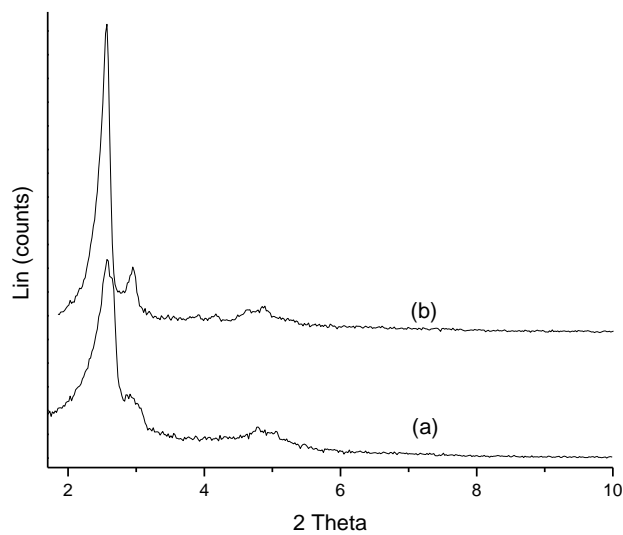

**Fig. A XRD pattern of (a) SiMCM-48 (two step), (b) SiMCM-48**

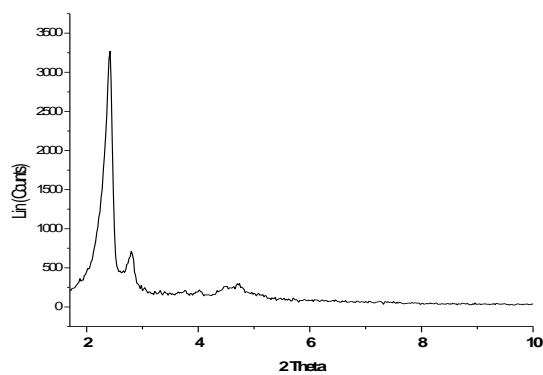

**Fig. B XRD pattern of as synthesized CeMCM-48(Si/Ce 40)**

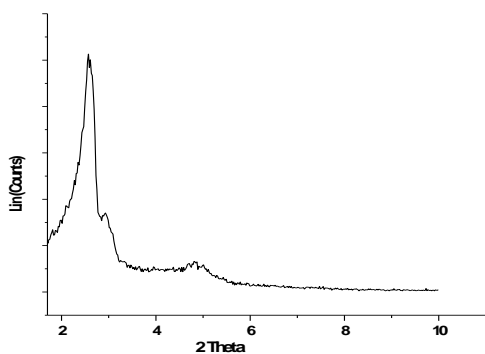

**Fig. C** XRD pattern of as synthesized  
VMCM-48(Si/V 40)

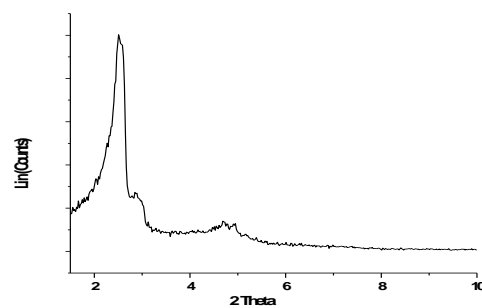

**Fig. D** XRD pattern of as synthesized  
ZrMCM-48(Si/Zr 40)

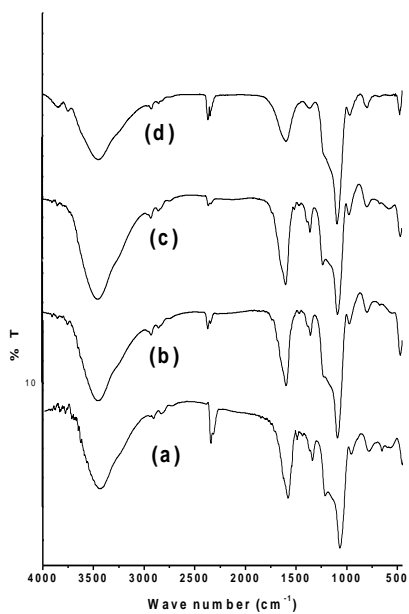

**Fig. E** FT-IR spectra of (a) SiMCM-48, (b) CeMCM-48(Si/Ce 40),  
(c) VMCM-48(Si/V 40), (d) ZrMCM-48(Si/Zr 40)

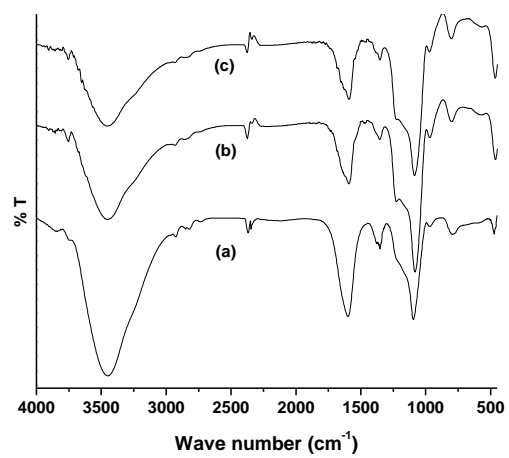

**Fig. F FT-IR spectra of (a) 1%  $V_{imp}$ SiMCM-48, (b) 3%  $V_{imp}$ SiMCM-48,  
(c) 5%  $V_{imp}$ SiMCM-48**
